# Supplementary material
Source: PubMed Central journal article supplement (PMC6644145)
Supplement: ao6b00210_si_001.pdf [file ao6b00210_si_001.pdf]

# Gadolinium-Functionalized Peptide Amphiphile Micelles for Multimodal Imaging of Atherosclerotic Lesions

Sang Pil Yoo<sup>1</sup>, Federico Pineda<sup>2</sup>, John C. Barrett<sup>1</sup>, Christopher Poon<sup>3,4</sup>, Matthew Tirrell<sup>1</sup>,

Eun Ji Chung<sup>1,4\*</sup>

1 Institute for Molecular Engineering, University of Chicago, 5747 South Ellis Avenue, Chicago, IL, 60637, USA

2 Department of Radiology, University of Chicago, 5841 South Maryland Avenue, MC2026, Chicago, IL 60637, USA

3 Department of Chemistry, University of Chicago, 929 E. 57<sup>th</sup> Street, Chicago, IL 60637, USA

4 Current Affiliation: Department of Biomedical Engineering, University of Southern California, 1042 Downey Way, Los Angeles, CA 90089-1111, USA

**Short title:** Gadolinium-functionalized micelles for atherosclerosis

\*Department of Biomedical Engineering  
University of Southern California  
1042 Downey Way, Denney Research Center 140  
Los Angeles, CA 90089-1111  
Tel.: +1-213-740-2925  
Fax: +1-213-821-3897  
Email: [eunchung@usc.edu](mailto:eunchung@usc.edu)

## Supplemental Figures and Legends

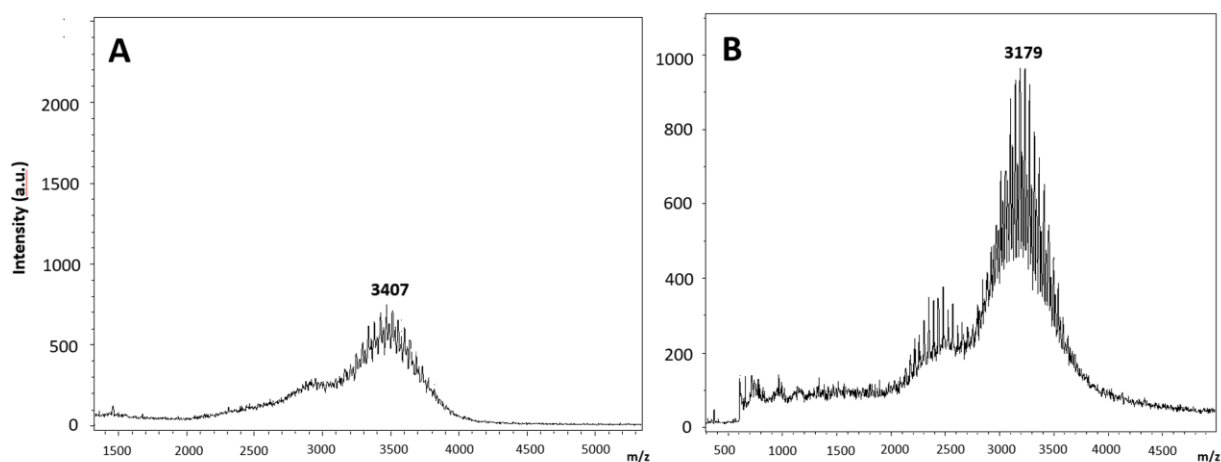

**Figure S1.** MALDI/TOF mass spectrometry results of A) DSPE-PEG2000-DTPA-tbutyl and B) deprotected DSPE-PEG2000-DTPA.

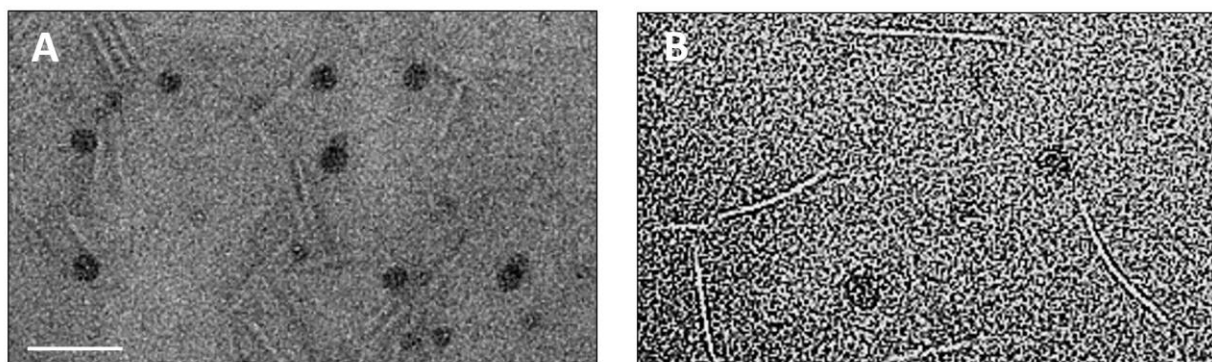

**Figure S2.** TEM images with higher magnification displaying heterogeneous shapes with DTPA-BSA(Gd) micelles. A) CREKA/DTPA-BSA(Gd) and B) NT/DTPA-BSA(Gd). SB: 100 nm.

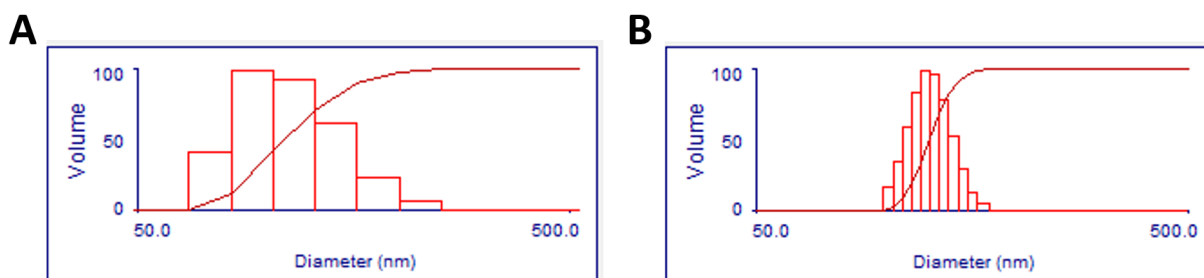

**Figure S3.** Dynamic light scattering data of DTPA-BSA(Gd) micelles. A second and larger population of particles are present for both A) CREKA (average diameter: 114.9 nm) and B) NT micelles (average diameter: 126.9 nm).

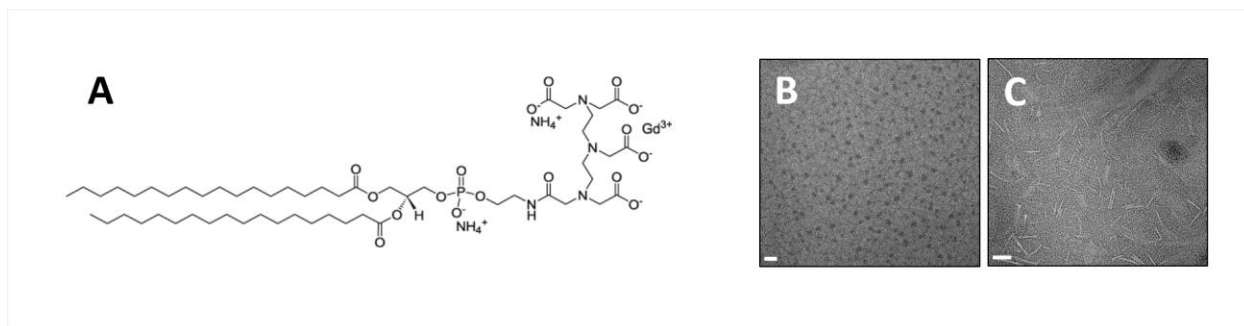

**Figure S4.** A) Chemical structure of DSPE-DTPA(Gd) and transmission electron micrographs of CREKA/DSPE-DTPA(Gd) show heterogeneous population of micelles consisting of B) spherical and C) cylindrical shapes. SB: 50 nm.

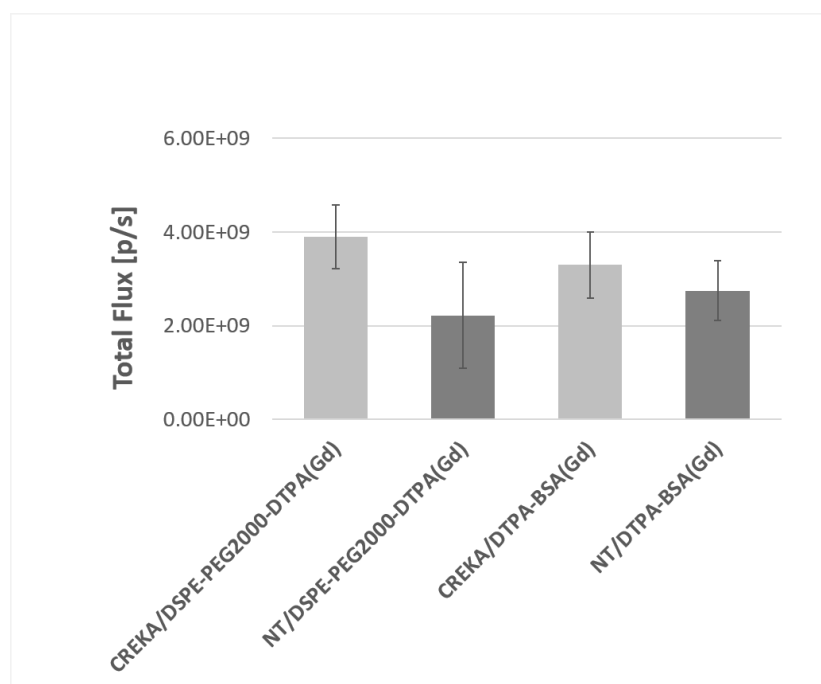

**Figure S5.** Total flux measurements obtained via optical imaging shows enhanced cy7 signal and targeting by CREKA/DSPE-PEG2000-DTPA(Gd).

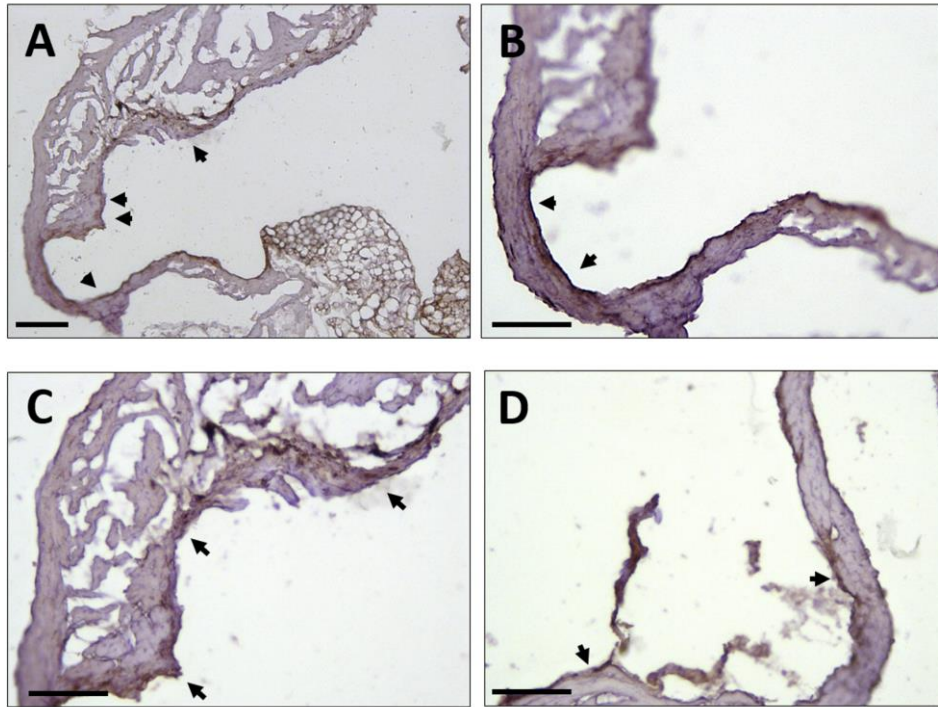

**Figure S6.** Figure S4. Representative immunohistochemistry data confirms fibrin expression on the aortic walls of all mice (brown staining, arrows). A) Low magnification, B-D) high magnification of CREKA/DSPE-PEG2000-DTPA(Gd). SB: 100  $\mu$ m (A), 75  $\mu$ m (B-D).
